# Supplementary material for: Wood Coloration and Decay Capabilities of Mycoparasite Scytalidium ganodermophthorum
Source: MDPI journal article supplement (doi:10.3390/jof9070738), 2023-07-11
Supplement: s1 [file s1]

*Supplemental Materials.*

**Table S1.** Welch's ANOVA test for week 18 color difference values.

| Week | Nutrients             | Wood           | n  | Statistic | Dfn | Dfd      | p- value |
|------|-----------------------|----------------|----|-----------|-----|----------|----------|
| ΔL   | Nutrient supplemented | Douglas fir    | 36 | 21.35     | 2   | 15.14471 | 3.92E-05 |
| ΔL   | Nutrient supplemented | Big leaf maple | 36 | 27.18     | 2   | 21.85131 | 1.18E-06 |
| ΔL   | Nutrient supplemented | Sugar maple    | 36 | 48.69     | 2   | 14.39766 | 3.91E-07 |
| ΔL   | Nutrient supplemented | White oak      | 36 | 79.91     | 2   | 19.92749 | 3.04E-10 |
| ΔL   | Non-supplemented      | Douglas fir    | 36 | 15.13     | 2   | 14.22267 | 0.000301 |
| ΔL   | Non-supplemented      | Big leaf maple | 36 | 22.3      | 2   | 18.61597 | 1.14E-05 |
| ΔL   | Non-supplemented      | Sugar maple    | 36 | 92.27     | 2   | 18.30766 | 2.74E-10 |
| ΔL   | Non-supplemented      | White oak      | 36 | 92.11     | 2   | 21.96461 | 2.09E-11 |
| ΔA   | Nutrient supplemented | Douglas fir    | 36 | 11.63     | 2   | 21.52697 | 0.000377 |
| ΔA   | Nutrient supplemented | Big leaf maple | 36 | 1.54      | 2   | 13.61946 | 0.249    |
| ΔA   | Nutrient supplemented | Sugar maple    | 36 | 0.2       | 2   | 20.04202 | 0.824    |
| ΔA   | Nutrient supplemented | White oak      | 36 | 48.73     | 2   | 21.83484 | 8.88E-09 |
| ΔA   | Non-supplemented      | Douglas fir    | 36 | 1.69      | 2   | 17.09425 | 0.213    |
| ΔA   | Non-supplemented      | Big leaf maple | 36 | 0.67      | 2   | 14.36269 | 0.528    |
| ΔA   | Non-supplemented      | Sugar maple    | 36 | 6.31      | 2   | 16.08743 | 0.009    |
| ΔA   | Non-supplemented      | White oak      | 36 | 2.15      | 2   | 21.76089 | 0.141    |
| ΔB   | Nutrient supplemented | Douglas fir    | 36 | 9.22      | 2   | 17.73677 | 0.002    |
| ΔB   | Nutrient supplemented | Big leaf maple | 36 | 1.18      | 2   | 15.60035 | 0.334    |
| ΔB   | Nutrient supplemented | Sugar maple    | 36 | 4.55      | 2   | 18.3074  | 0.025    |
| ΔB   | Nutrient supplemented | White oak      | 36 | 1.67      | 2   | 21.92943 | 0.212    |
| ΔB   | Non-supplemented      | Douglas fir    | 36 | 1.61      | 2   | 18.27395 | 0.227    |
| ΔB   | Non-supplemented      | Big leaf maple | 36 | 3.93      | 2   | 16.84513 | 0.04     |
| ΔB   | Non-supplemented      | Sugar maple    | 36 | 6.03      | 2   | 13.3151  | 0.014    |
| ΔB   | Non-supplemented      | White oak      | 36 | 18.73     | 2   | 14.6492  | 9.20E-05 |

**Table S2.** Welch's ANOVA test for  $\Delta L$  color differences across weeks

| Week | Nutrients             | Wood           | n  | Statistic | Dfn | Dfd      | p-value  |
|------|-----------------------|----------------|----|-----------|-----|----------|----------|
| 18   | Nutrient supplemented | Douglas fir    | 36 | 10.85     | 2   | 13.6463  | 0.002    |
| 18   | Nutrient supplemented | Big leaf maple | 36 | 27.3      | 2   | 21.84226 | 1.15E-06 |
| 18   | Nutrient supplemented | Sugar maple    | 36 | 49.4      | 2   | 14.61064 | 3.15E-07 |
| 18   | Nutrient supplemented | White oak      | 36 | 81.55     | 2   | 20.08609 | 2.28E-10 |
| 18   | Non-supplemented      | Douglas fir    | 36 | 12.23     | 2   | 14.81172 | 0.000732 |
| 18   | Non-supplemented      | Big leaf maple | 36 | 22.22     | 2   | 18.6073  | 1.17E-05 |
| 18   | Non-supplemented      | Sugar maple    | 36 | 61.18     | 2   | 15.95086 | 3.30E-08 |
| 18   | Non-supplemented      | White oak      | 36 | 92.11     | 2   | 21.96461 | 2.09E-11 |
| 12   | Nutrient supplemented | Douglas fir    | 36 | 2.84      | 2   | 11.29606 | 0.1      |
| 12   | Nutrient supplemented | Big leaf maple | 36 | 17.85     | 2   | 18.0774  | 5.25E-05 |
| 12   | Nutrient supplemented | Sugar maple    | 36 | 87.4      | 2   | 17.15049 | 1.01E-09 |
| 12   | Nutrient supplemented | White oak      | 36 | 34.44     | 2   | 17.43424 | 8.80E-07 |
| 12   | Non-supplemented      | Douglas fir    | 36 | 8.95      | 2   | 13.45056 | 0.003    |
| 12   | Non-supplemented      | Big leaf maple | 36 | 71.99     | 2   | 20.35771 | 5.86E-10 |
| 12   | Non-supplemented      | Sugar maple    | 36 | 68.23     | 2   | 14.32112 | 4.78E-08 |
| 12   | Non-supplemented      | White oak      | 36 | 35.73     | 2   | 19.52813 | 2.98E-07 |
| 6    | Nutrient supplemented | Douglas fir    | 36 | 51.03     | 2   | 19.49164 | 1.79E-08 |
| 6    | Nutrient supplemented | Big leaf maple | 36 | 15.5      | 2   | 21.34862 | 6.96E-05 |
| 6    | Nutrient supplemented | Sugar maple    | 36 | 61.66     | 2   | 12.49335 | 3.36E-07 |
| 6    | Nutrient supplemented | White oak      | 36 | 21.1      | 2   | 14.25719 | 5.49E-05 |
| 6    | Non-supplemented      | Douglas fir    | 36 | 0.51      | 2   | 15.68529 | 0.611    |
| 6    | Non-supplemented      | Big leaf maple | 36 | 18.76     | 2   | 19.00405 | 3.17E-05 |

|   |                  |             |    |       |   |          |          |
|---|------------------|-------------|----|-------|---|----------|----------|
| 6 | Non-supplemented | Sugar maple | 36 | 37.34 | 2 | 14.96449 | 1.52E-06 |
| 6 | Non-supplemented | White oak   | 36 | 50.05 | 2 | 15.87426 | 1.40E-07 |

Table S3. Tukey's HSD comparisons for  $\Delta L^*$  values across weeks

| Week | Nutrients             | Wood Species   | Condition 1 | Condition 2 | Low Confidence | High Confidence | Adjusted p-value | Significance |
|------|-----------------------|----------------|-------------|-------------|----------------|-----------------|------------------|--------------|
| 18   | Nutrient supplemented | Doug fir       | Control     | Sg_0        | -3.77533       | -9.15185        | 1.601185         | 2.12E-01     |
| 18   | Nutrient supplemented | Doug fir       | Control     | Sg_1        | -12.814        | -18.1905        | -7.43748         | 4.44E-06     |
| 18   | Nutrient supplemented | Doug fir       | Sg_0        | Sg_1        | -9.03867       | -13.1029        | -4.9744          | 1.40E-05     |
| 18   | Nutrient supplemented | Big leaf maple | Control     | Sg_0        | -7.06533       | -11.3367        | -2.79395         | 0.000812     |
| 18   | Nutrient supplemented | Big leaf maple | Control     | Sg_1        | -4.994         | -9.26538        | -0.72262         | 0.019        |
| 18   | Nutrient supplemented | Big leaf maple | Sg_0        | Sg_1        | 2.071333       | -1.15753        | 5.300192         | 0.271        |
| 18   | Nutrient supplemented | Sugar maple    | Control     | Sg_0        | -20.7618       | -25.9189        | -15.6048         | 6.56E-11     |
| 18   | Nutrient supplemented | Sugar maple    | Control     | Sg_1        | -16.4348       | -21.5919        | -11.2778         | 1.54E-08     |
| 18   | Nutrient supplemented | Sugar maple    | Sg_0        | Sg_1        | 4.327          | 0.428617        | 8.225383         | 2.70E-02     |
| 18   | Nutrient supplemented | White oak      | Control     | Sg_0        | -17.6252       | -23.0146        | -12.2357         | 8.73E-09     |
| 18   | Nutrient supplemented | White oak      | Control     | Sg_1        | -15.2068       | -20.5963        | -9.8174          | 1.94E-07     |
| 18   | Nutrient supplemented | White oak      | Sg_0        | Sg_1        | 2.418333       | -1.6557         | 6.492363         | 3.25E-01     |
| 18   | Non-supplemented      | Doug fir       | Control     | Sg_0        | -6.1           | -11.4296        | -0.77044         | 0.022        |

|    |                               |                   |         |      |          |          |          |          |
|----|-------------------------------|-------------------|---------|------|----------|----------|----------|----------|
| 18 | Non-sup-<br>ple-<br>mented    | Doug fir          | Control | Sg_1 | -9.882   | -15.2116 | -4.55244 | 0.0002   |
| 18 | Non-sup-<br>ple-<br>mented    | Doug fir          | Sg_0    | Sg_1 | -3.782   | -7.81077 | 0.24677  | 0.0693   |
| 18 | Non-sup-<br>ple-<br>mented    | Big leaf<br>maple | Control | Sg_0 | -9.77533 | -15.6325 | -3.9182  | 0.000732 |
| 18 | Non-sup-<br>ple-<br>mented    | Big leaf<br>maple | Control | Sg_1 | -8.962   | -14.8191 | -3.10487 | 0.00189  |
| 18 | Non-sup-<br>ple-<br>mented    | Big leaf<br>maple | Sg_0    | Sg_1 | 0.813333 | -3.61424 | 5.240909 | 0.894    |
| 18 | Non-sup-<br>ple-<br>mented    | Sugar<br>maple    | Control | Sg_0 | -16.9548 | -21.3985 | -12.5112 | 2.45E-10 |
| 18 | Non-sup-<br>ple-<br>mented    | Sugar<br>maple    | Control | Sg_1 | -15.0625 | -19.5061 | -10.6189 | 3.91E-09 |
| 18 | Non-sup-<br>ple-<br>mented    | Sugar<br>maple    | Sg_0    | Sg_1 | 1.892333 | -1.46673 | 5.251392 | 3.62E-01 |
| 18 | Non-sup-<br>ple-<br>mented    | White<br>oak      | Control | Sg_0 | -20.1882 | -27.3501 | -13.0263 | 1.98E-07 |
| 18 | Non-sup-<br>ple-<br>mented    | White<br>oak      | Control | Sg_1 | -18.2805 | -25.4424 | -11.1186 | 1.32E-06 |
| 18 | Non-sup-<br>ple-<br>mented    | White<br>oak      | Sg_0    | Sg_1 | 1.907667 | -3.50623 | 7.32156  | 6.66E-01 |
| 12 | Nutrient<br>supple-<br>mented | Doug fir          | Control | Sg_0 | -5.181   | -10.0612 | -0.30082 | 0.0355   |
| 12 | Nutrient<br>supple-<br>mented | Doug fir          | Control | Sg_1 | -6.903   | -11.7832 | -2.02282 | 0.00408  |
| 12 | Nutrient<br>supple-<br>mented | Doug fir          | Sg_0    | Sg_1 | -1.722   | -5.41107 | 1.967068 | 0.494    |
| 12 | Nutrient<br>supple-<br>mented | Big leaf<br>maple | Control | Sg_0 | -10.989  | -18.3804 | -3.59756 | 0.00253  |
| 12 | Nutrient<br>supple-<br>mented | Big leaf<br>maple | Control | Sg_1 | -9.08433 | -16.4758 | -1.69289 | 0.0132   |
| 12 | Nutrient<br>supple-<br>mented | Big leaf<br>maple | Sg_0    | Sg_1 | 1.904667 | -3.68274 | 7.49207  | 0.683    |

|    |                       |                |         |      |          |          |          |          |
|----|-----------------------|----------------|---------|------|----------|----------|----------|----------|
| 12 | Nutrient supplemented | Sugar maple    | Control | Sg_0 | -20.2303 | -25.9698 | -14.4908 | 1.60E-09 |
| 12 | Nutrient supplemented | Sugar maple    | Control | Sg_1 | -17.6543 | -23.3938 | -11.9148 | 3.29E-08 |
| 12 | Nutrient supplemented | Sugar maple    | Sg_0    | Sg_1 | 2.576    | -1.76265 | 6.91465  | 3.24E-01 |
| 12 | Nutrient supplemented | White oak      | Control | Sg_0 | -10.989  | -18.3804 | -3.59756 | 0.00253  |
| 12 | Nutrient supplemented | White oak      | Control | Sg_1 | -9.08433 | -16.4758 | -1.69289 | 0.0132   |
| 12 | Nutrient supplemented | White oak      | Sg_0    | Sg_1 | 1.904667 | -3.68274 | 7.49207  | 0.683    |
| 12 | Non-supplemented      | Doug fir       | Control | Sg_0 | -11.6437 | -18.0521 | -5.23527 | 0.00026  |
| 12 | Non-supplemented      | Doug fir       | Control | Sg_1 | -11.5523 | -17.9607 | -5.14394 | 0.000287 |
| 12 | Non-supplemented      | Doug fir       | Sg_0    | Sg_1 | 0.091333 | -4.75296 | 4.935624 | 0.999    |
| 12 | Non-supplemented      | Big leaf maple | Control | Sg_0 | -11.8233 | -15.8536 | -7.79306 | 8.84E-08 |
| 12 | Non-supplemented      | Big leaf maple | Control | Sg_1 | -9.314   | -13.3443 | -5.28373 | 7.48E-06 |
| 12 | Non-supplemented      | Big leaf maple | Sg_0    | Sg_1 | 2.509333 | -0.53727 | 5.555935 | 1.23E-01 |
| 12 | Non-supplemented      | Sugar maple    | Control | Sg_0 | -16.0977 | -20.1027 | -12.0926 | 6.83E-11 |
| 12 | Non-supplemented      | Sugar maple    | Control | Sg_1 | -15.103  | -19.1081 | -11.0979 | 3.25E-10 |
| 12 | Non-supplemented      | Sugar maple    | Sg_0    | Sg_1 | 0.994667 | -2.03288 | 4.022216 | 7.02E-01 |
| 12 | Non-supplemented      | White oak      | Control | Sg_0 | -15.5493 | -22.6745 | -8.42412 | 1.90E-05 |
| 12 | Non-supplemented      | White oak      | Control | Sg_1 | -14.012  | -21.1372 | -6.88679 | 8.95E-05 |

|    |                               |                   |         |      |          |          |          |          |
|----|-------------------------------|-------------------|---------|------|----------|----------|----------|----------|
| 12 | Non-sup-<br>ple-<br>mented    | White<br>oak      | Sg_0    | Sg_1 | 1.537333 | -3.84882 | 6.923489 | 7.65E-01 |
| 6  | Nutrient<br>supple-<br>mented | Doug fir          | Control | Sg_0 | -9.211   | -14.2626 | -4.15937 | 2.48E-04 |
| 6  | Nutrient<br>supple-<br>mented | Doug fir          | Control | Sg_1 | -13.6263 | -18.678  | -8.57471 | 4.67E-07 |
| 6  | Nutrient<br>supple-<br>mented | Doug fir          | Sg_0    | Sg_1 | -4.41533 | -8.234   | -0.59666 | 2.05E-02 |
| 6  | Nutrient<br>supple-<br>mented | Big leaf<br>maple | Control | Sg_0 | -7.925   | -13.7059 | -2.14412 | 0.00542  |
| 6  | Nutrient<br>supple-<br>mented | Big leaf<br>maple | Control | Sg_1 | -5.79233 | -11.5732 | -0.01145 | 0.0495   |
| 6  | Nutrient<br>supple-<br>mented | Big leaf<br>maple | Sg_0    | Sg_1 | 2.132667 | -2.23727 | 6.502601 | 0.463    |
| 6  | Nutrient<br>supple-<br>mented | Sugar<br>maple    | Control | Sg_0 | -16.7243 | -20.3276 | -13.1211 | 1.76E-12 |
| 6  | Nutrient<br>supple-<br>mented | Sugar<br>maple    | Control | Sg_1 | -16.8983 | -20.5016 | -13.2951 | 1.35E-12 |
| 6  | Nutrient<br>supple-<br>mented | Sugar<br>maple    | Sg_0    | Sg_1 | -0.174   | -2.89781 | 2.549808 | 9.87E-01 |
| 6  | Nutrient<br>supple-<br>mented | White<br>oak      | Control | Sg_0 | -13.7903 | -19.7175 | -7.86314 | 6.68E-06 |
| 6  | Nutrient<br>supple-<br>mented | White<br>oak      | Control | Sg_1 | -15.1937 | -21.1209 | -9.26647 | 1.22E-06 |
| 6  | Nutrient<br>supple-<br>mented | White<br>oak      | Sg_0    | Sg_1 | -1.40333 | -5.88387 | 3.077204 | 7.25E-01 |
| 6  | Non-sup-<br>ple-<br>mented    | Doug fir          | Control | Sg_0 | -2.13933 | -8.02868 | 3.750015 | 0.649    |
| 6  | Non-sup-<br>ple-<br>mented    | Doug fir          | Control | Sg_1 | -1.476   | -7.36535 | 4.413348 | 0.813    |
| 6  | Non-sup-<br>ple-<br>mented    | Doug fir          | Sg_0    | Sg_1 | 0.663333 | -3.7886  | 5.115262 | 0.929    |
| 6  | Non-sup-<br>ple-<br>mented    | Big leaf<br>maple | Control | Sg_0 | -7.312   | -11.9259 | -2.69811 | 0.00131  |

|   |                            |                   |         |      |          |          |          |          |
|---|----------------------------|-------------------|---------|------|----------|----------|----------|----------|
| 6 | Non-sup-<br>ple-<br>mented | Big leaf<br>maple | Control | Sg_1 | -7.078   | -11.6919 | -2.46411 | 0.00184  |
| 6 | Non-sup-<br>ple-<br>mented | Big leaf<br>maple | Sg_0    | Sg_1 | 0.234    | -3.25377 | 3.721774 | 0.985    |
| 6 | Non-sup-<br>ple-<br>mented | Sugar<br>maple    | Control | Sg_0 | -13.5863 | -17.9234 | -9.24927 | 2.23E-08 |
| 6 | Non-sup-<br>ple-<br>mented | Sugar<br>maple    | Control | Sg_1 | -12.6017 | -16.9387 | -8.26461 | 1.08E-07 |
| 6 | Non-sup-<br>ple-<br>mented | Sugar<br>maple    | Sg_0    | Sg_1 | 0.984667 | -2.29384 | 4.263175 | 7.43E-01 |
| 6 | Non-sup-<br>ple-<br>mented | White<br>oak      | Control | Sg_0 | -17.089  | -23.3328 | -10.8452 | 3.53E-07 |
| 6 | Non-sup-<br>ple-<br>mented | White<br>oak      | Control | Sg_1 | -13.7917 | -20.0355 | -7.54785 | 1.56E-05 |
| 6 | Non-sup-<br>ple-<br>mented | White<br>oak      | Sg_0    | Sg_1 | 3.297333 | -1.42255 | 8.017214 | 2.15E-01 |

Table S4. Welch's ANOVA test results for percent mass loss by week.

| Week | Nutrients                     | Wood           | n  | Statistic | Dfn | Dfd      | p-value  |
|------|-------------------------------|----------------|----|-----------|-----|----------|----------|
| 18   | Nutrient<br>supple-<br>mented | Doug fir       | 36 | 48.92     | 2   | 13.06143 | 8.58E-07 |
| 18   | Nutrient<br>supple-<br>mented | Big leaf maple | 36 | 18.93     | 2   | 19.22165 | 2.86E-05 |
| 18   | Nutrient<br>supple-<br>mented | sugar maple    | 36 | 0.05      | 2   | 13.3992  | 0.951    |
| 18   | Non-sup-<br>plemented         | Doug fir       | 36 | 3.14      | 2   | 11.24719 | 0.083    |
| 18   | Non-sup-<br>plemented         | Big leaf maple | 36 | 1.11      | 2   | 10.7046  | 0.364    |
| 18   | Non-sup-<br>plemented         | Sugar maple    | 36 | 8.7       | 2   | 17.45784 | 0.002    |
| 12   | Nutrient<br>supple-<br>mented | Doug fir       | 36 | 102.24    | 2   | 21.23627 | 1.26E-11 |
| 12   | Nutrient<br>supple-<br>mented | Big leaf maple | 36 | 17.09     | 2   | 19.25326 | 5.40E-05 |

|    |                       |                |    |       |   |          |          |
|----|-----------------------|----------------|----|-------|---|----------|----------|
| 12 | Nutrient supplemented | Sugar maple    | 36 | 10.18 | 2 | 19.53943 | 0.000936 |
| 12 | Non-supplemented      | Doug fir       | 36 | 6.14  | 2 | 10.8052  | 0.017    |
| 12 | Non-supplemented      | Big leaf maple | 36 | 3.56  | 2 | 11.17457 | 0.064    |
| 12 | Non-supplemented      | Sugar maple    | 36 | 0.49  | 2 | 17.12183 | 0.624    |
| 6  | Nutrient supplemented | Doug fir       | 36 | 21.66 | 2 | 12.84932 | 7.66E-05 |
| 6  | Nutrient supplemented | Big leaf maple | 36 | 11.99 | 2 | 19.92528 | 0.000381 |
| 6  | Nutrient supplemented | Sugar maple    | 36 | 19.03 | 2 | 21.94296 | 1.61E-05 |
| 6  | Non-supplemented      | Doug fir       | 36 | 30.07 | 2 | 20.14843 | 8.95E-07 |
| 6  | Non-supplemented      | Big leaf maple | 36 | 25.43 | 2 | 11.52978 | 5.92E-05 |
| 6  | Non-supplemented      | Sugar maple    | 36 | 5.45  | 2 | 19.22584 | 0.013    |

Table S5. Tukey's HSD comparisons of block conditions and percent mass loss across weeks.

| Week | Nutrients             | Wood Species   | Condition 1 | Condition 2 | Low Confidence | High Confidence | Adjusted p-value | Significance |
|------|-----------------------|----------------|-------------|-------------|----------------|-----------------|------------------|--------------|
| 18   | Nutrient supplemented | Doug fir       | Control     | Sg_0        | 0.0069         | 0.0050          | 0.0087           | 4.75E-10     |
| 18   | Nutrient supplemented | Doug fir       | Control     | Sg_1        | 0.0067         | 0.0048          | 0.0085           | 1.01E-09     |
| 18   | Nutrient supplemented | Doug fir       | Sg_0        | Sg_1        | -0.0002        | -0.0016         | 0.0012           | 9.24E-01     |
| 18   | Nutrient supplemented | Big leaf maple | Control     | Sg_0        | 0.0248         | 0.0009          | 0.0486           | 0.0404       |
| 18   | Nutrient supplemented | Big leaf maple | Control     | Sg_1        | 0.0217         | -0.0022         | 0.0456           | 0.0804       |
| 18   | Nutrient supplemented | Big leaf maple | Sg_0        | Sg_1        | -0.0031        | -0.0211         | 0.0150           | 0.908        |



|    |                       |                |         |      |         |         |        |          |
|----|-----------------------|----------------|---------|------|---------|---------|--------|----------|
| 18 | Nutrient supplemented | Sugar maple    | Control | Sg_0 | -0.0003 | -0.0214 | 0.0209 | 0.999    |
| 18 | Nutrient supplemented | Sugar maple    | Control | Sg_1 | 0.0018  | -0.0194 | 0.0229 | 0.977    |
| 18 | Nutrient supplemented | Sugar maple    | Sg_0    | Sg_1 | 0.0020  | -0.0140 | 0.0180 | 0.948    |
| 18 | Non-supplemented      | Doug fir       | Control | Sg_0 | 0.0047  | -0.0134 | 0.0227 | 0.804    |
| 18 | Non-supplemented      | Doug fir       | Control | Sg_1 | 0.0066  | -0.0115 | 0.0247 | 0.648    |
| 18 | Non-supplemented      | Doug fir       | Sg_0    | Sg_1 | 0.0019  | -0.0117 | 0.0156 | 0.936    |
| 18 | Non-supplemented      | Big leaf maple | Control | Sg_0 | 0.0049  | -0.0037 | 0.0135 | 0.354    |
| 18 | Non-supplemented      | Big leaf maple | Control | Sg_1 | 0.0019  | -0.0067 | 0.0105 | 0.852    |
| 18 | Non-supplemented      | Big leaf maple | Sg_0    | Sg_1 | -0.0030 | -0.0095 | 0.0035 | 0.501    |
| 18 | Non-supplemented      | Sugar maple    | Control | Sg_0 | 0.0051  | 0.0005  | 0.0097 | 0.026    |
| 18 | Non-supplemented      | Sugar maple    | Control | Sg_1 | 0.0057  | 0.0011  | 0.0103 | 0.0131   |
| 18 | Non-supplemented      | Sugar maple    | Sg_0    | Sg_1 | 0.0005  | -0.0030 | 0.0040 | 0.927    |
| 12 | Nutrient supplemented | Doug fir       | Control | Sg_0 | 0.0089  | 0.0062  | 0.0115 | 5.84E-09 |
| 12 | Nutrient supplemented | Doug fir       | Control | Sg_1 | 0.0077  | 0.0050  | 0.0103 | 1.33E-07 |
| 12 | Nutrient supplemented | Doug fir       | Sg_0    | Sg_1 | -0.0012 | -0.0032 | 0.0008 | 3.15E-01 |
| 12 | Nutrient supplemented | Big leaf maple | Control | Sg_0 | 0.0219  | -0.0105 | 0.0542 | 0.236    |
| 12 | Nutrient supplemented | Big leaf maple | Control | Sg_1 | 0.0392  | 0.0069  | 0.0716 | 0.0146   |

|    |                       |                |         |      |         |         |         |          |
|----|-----------------------|----------------|---------|------|---------|---------|---------|----------|
| 12 | Nutrient supplemented | Big leaf maple | Sg_0    | Sg_1 | 0.0174  | -0.0071 | 0.0418  | 0.205    |
| 12 | Nutrient supplemented | Sugar maple    | Control | Sg_0 | 0.0368  | 0.0005  | 0.0731  | 0.0464   |
| 12 | Nutrient supplemented | Sugar maple    | Control | Sg_1 | 0.0134  | -0.0229 | 0.0497  | 0.64     |
| 12 | Nutrient supplemented | Sugar maple    | Sg_0    | Sg_1 | -0.0234 | -0.0509 | 0.0041  | 0.107    |
| 12 | Non-supplemented      | Doug fir       | Control | Sg_0 | 0.0045  | -0.0134 | 0.0224  | 0.814    |
| 12 | Non-supplemented      | Doug fir       | Control | Sg_1 | 0.0023  | -0.0157 | 0.0202  | 0.949    |
| 12 | Non-supplemented      | Doug fir       | Sg_0    | Sg_1 | -0.0022 | -0.0158 | 0.0113  | 0.915    |
| 12 | Non-supplemented      | Big leaf maple | Control | Sg_0 | 0.0056  | 0.0009  | 0.0102  | 0.0168   |
| 12 | Non-supplemented      | Big leaf maple | Control | Sg_1 | 0.0023  | -0.0024 | 0.0069  | 0.468    |
| 12 | Non-supplemented      | Big leaf maple | Sg_0    | Sg_1 | -0.0033 | -0.0068 | 0.0002  | 0.0713   |
| 12 | Non-supplemented      | Sugar maple    | Control | Sg_0 | 0.0011  | -0.0031 | 0.0053  | 0.795    |
| 12 | Non-supplemented      | Sugar maple    | Control | Sg_1 | 0.0013  | -0.0030 | 0.0055  | 0.742    |
| 12 | Non-supplemented      | Sugar maple    | Sg_0    | Sg_1 | 0.0002  | -0.0030 | 0.0034  | 0.992    |
| 6  | Nutrient supplemented | Doug fir       | Control | Sg_0 | 0.0071  | 0.0047  | 0.0095  | 6.61E-08 |
| 6  | Nutrient supplemented | Doug fir       | Control | Sg_1 | 0.0050  | 0.0026  | 0.0074  | 4.09E-05 |
| 6  | Nutrient supplemented | Doug fir       | Sg_0    | Sg_1 | -0.0022 | -0.0040 | -0.0003 | 1.68E-02 |
| 6  | Nutrient supplemented | Big leaf maple | Control | Sg_0 | 0.0209  | -0.0025 | 0.0442  | 0.0873   |

|   |                       |                |         |      |         |         |         |          |
|---|-----------------------|----------------|---------|------|---------|---------|---------|----------|
| 6 | Nutrient supplemented | Big leaf maple | Control | Sg_1 | 0.0191  | -0.0043 | 0.0424  | 0.127    |
| 6 | Nutrient supplemented | Big leaf maple | Sg_0    | Sg_1 | -0.0018 | -0.0194 | 0.0159  | 0.966    |
| 6 | Nutrient supplemented | Sugar maple    | Control | Sg_0 | 0.0166  | 0.0038  | 0.0295  | 0.00884  |
| 6 | Nutrient supplemented | Sugar maple    | Control | Sg_1 | 0.0161  | 0.0033  | 0.0290  | 0.0113   |
| 6 | Nutrient supplemented | Sugar maple    | Sg_0    | Sg_1 | -0.0005 | -0.0102 | 0.0092  | 0.991    |
| 6 | Non-supplemented      | Doug fir       | Control | Sg_0 | 0.0031  | 0.0016  | 0.0047  | 7.32E-05 |
| 6 | Non-supplemented      | Doug fir       | Control | Sg_1 | 0.0027  | 0.0011  | 0.0042  | 6.12E-04 |
| 6 | Non-supplemented      | Doug fir       | Sg_0    | Sg_1 | -0.0005 | -0.0017 | 0.0007  | 5.99E-01 |
| 6 | Non-supplemented      | Big leaf maple | Control | Sg_0 | 0.0061  | 0.0034  | 0.0087  | 8.24E-06 |
| 6 | Non-supplemented      | Big leaf maple | Control | Sg_1 | 0.0015  | -0.0011 | 0.0042  | 3.37E-01 |
| 6 | Non-supplemented      | Big leaf maple | Sg_0    | Sg_1 | -0.0045 | -0.0065 | -0.0025 | 1.02E-05 |
| 6 | Non-supplemented      | Sugar maple    | Control | Sg_0 | 0.0034  | -0.0001 | 0.0069  | 0.0581   |
| 6 | Non-supplemented      | Sugar maple    | Control | Sg_1 | 0.0022  | -0.0013 | 0.0057  | 0.277    |
| 6 | Non-supplemented      | Sugar maple    | Sg_0    | Sg_1 | -0.0012 | -0.0038 | 0.0015  | 0.525    |

Table S6. ANOVA test results for enzyme activity

| Enzyme        | Comparison       | DFn | DFd | F     | p     |
|---------------|------------------|-----|-----|-------|-------|
| Endocellulase | Substrate        | 1   | 12  | 0.034 | 0.857 |
| Endocellulase | Strain           | 2   | 12  | 0.026 | 0.975 |
| Endocellulase | Substrate:Strain | 2   | 12  | 1.133 | 0.354 |

|           |                  |   |    |         |          |
|-----------|------------------|---|----|---------|----------|
| Chitinase | Substrate        | 1 | 12 | 794.025 | 2.47E-12 |
| Chitinase | Strain           | 2 | 12 | 237.198 | 2.26E-10 |
| Chitinase | Substrate:Strain | 2 | 12 | 251.71  | 1.59E-10 |

Table S7. Tukey's HSD test for ANOVA results for enzyme activity

| Substrate        | Condition 1 | Condition 2 | Estimate  | Low confidence | High confidence | Adjusted p-value |
|------------------|-------------|-------------|-----------|----------------|-----------------|------------------|
| Substrate        | agar        | maple       | -9.36E-04 | -0.001008      | -0.000863       | 1.34E-12         |
| Strain           | 0           | 10320       | 5.60E-04  | 0.0004515      | 0.0006685       | 2.86E-08         |
| Strain           | 0           | 10321       | 8.74E-04  | 0.0007659      | 0.0009829       | 1.75E-10         |
| Strain           | 10320       | 10321       | 3.14E-04  | 0.0002059      | 0.0004229       | 1.48E-05         |
| Substrate:Strain | agar:0      | maple:0     | 1.30E-05  | -0.00018       | 0.0002062       | 1.00E+00         |
| Substrate:Strain | agar:0      | agar:10320  | 1.07E-03  | 0.0008798      | 0.0012662       | 4.26E-09         |
| Substrate:Strain | agar:0      | maple:10320 | 6.00E-05  | -0.000133      | 0.0002532       | 8.94E-01         |
| Substrate:Strain | agar:0      | agar:10321  | 1.78E-03  | 0.0015913      | 0.0019777       | 5.14E-12         |
| Substrate:Strain | agar:0      | maple:10321 | -2.27E-05 | -0.000216      | 0.0001705       | 9.98E-01         |
| Substrate:Strain | maple:0     | agar:10320  | 1.06E-03  | 0.0008668      | 0.0012532       | 4.86E-09         |
| Substrate:Strain | maple:0     | maple:10320 | 4.70E-05  | -0.000146      | 0.0002402       | 9.59E-01         |
| Substrate:Strain | maple:0     | agar:10321  | 1.77E-03  | 0.0015783      | 0.0019647       | 5.43E-12         |
| Substrate:Strain | maple:0     | maple:10321 | -3.57E-05 | -0.000229      | 0.0001575       | 9.87E-01         |
| Substrate:Strain | agar:10320  | maple:10320 | -1.01E-03 | -0.001206      | -0.00082        | 7.87E-09         |
| Substrate:Strain | agar:10320  | agar:10321  | 7.12E-04  | 0.0005183      | 0.0009047       | 4.10E-07         |
| Substrate:Strain | agar:10320  | maple:10321 | -1.10E-03 | -0.001289      | -0.000902       | 3.39E-09         |
| Substrate:Strain | maple:10320 | agar:10321  | 1.72E-03  | 0.0015313      | 0.0019177       | 6.77E-12         |
| Substrate:Strain | maple:10320 | maple:10321 | -8.27E-05 | -0.000276      | 0.0001105       | 7.06E-01         |
| Substrate:Strain | agar:10321  | maple:10321 | -1.81E-03 | -0.002         | -0.001614       | 4.70E-12         |
